# Supplementary material for: Elevated inflammatory biomarkers during unemployment: modification by age and country in the UK
Source: HighWire-hosted journal article supplement (doi:10.1136/jech-2014-204404), 2015-02-19
Supplement: jech-2014-204404supp_appendixA.pdf [file jech-2014-204404supp_appendixA.pdf]

| <b>APPENDIX A: Inflammatory markers by year and country (final analytic samples)</b> |            |             |                  |                           |           |             |
|--------------------------------------------------------------------------------------|------------|-------------|------------------|---------------------------|-----------|-------------|
|                                                                                      | CRP (mg/L) |             | Fibrinogen (g/L) |                           | CRP>3mg/L |             |
|                                                                                      | N          | Mean (S.D.) | N                | Mean (S.D.)<br>Fibrinogen | N         | % CRP>3mg/L |
| HSE 1998/9                                                                           | 7208       | 1.93(2.02)  | 6669             | 2.52(0.60)                | 7208      | 21.2        |
| HSE 2003                                                                             | 5499       | 2.04 (2.07) | 4910             | 2.82(0.64)                | 5,499     | 23.5        |
| HSE 2006                                                                             | 4847       | 1.97(2.00)  | 4268             | 2.86(0.63)                | 4847      | 21.9        |
| HSE 2009                                                                             | 1443       | 2.00(1.98)  | 1277             | 2.98(0.52)                | 1443      | 22.8        |
| SHeS 2003                                                                            | 2498       | 2.04(2.09)  | 2191             | 2.84(0.61)                | 2498      | 22.7        |
| SHeS 2008                                                                            | 508        | 2.07(1.99)  | 431              | 3.13(0.49)                | 508       | 24.0        |
| SHeS 2009                                                                            | 518        | 2.01 (1.99) | 435              | 3.02(0.59)                | 518       | 21.8        |
| SHeS 2010                                                                            | 504        | 1.81 (1.84) | 433              | 2.86(0.51)                | 504       | 18.3        |
| ALL ENGLISH SURVEYS                                                                  | 18997      | 1.98( 2.03) | 17202            | 2.73(0.64)                | 18997     | 22.2        |
| ALL SCOTTISH SURVEYS                                                                 | 4028       | 2.01(2.03)  | 3522             | 2.90(0.60)                | 4028      | 22.2        |
