# Supplementary material for: Elevated inflammatory biomarkers during unemployment: modification by age and country in the UK
Source: HighWire-hosted journal article supplement (doi:10.1136/jech-2014-204404), 2015-02-19
Supplement: jech-2014-204404supp_appendixB.pdf [file jech-2014-204404supp_appendixB.pdf]

| <b>APPENDIX B: Elevations in inflammatory markers, unemployed vs. employed participants: ENGLAND ONLY</b> |                                        |            |      |                                              |            |       |                      |           |       |
|-----------------------------------------------------------------------------------------------------------|----------------------------------------|------------|------|----------------------------------------------|------------|-------|----------------------|-----------|-------|
|                                                                                                           | CRP (mg/L, log-transformed)<br>N=18997 |            |      | Fibrinogen (g/L, log-transformed)<br>N=17202 |            |       | CRP>3mg/L<br>N=18997 |           |       |
| <b>Adjustment level</b>                                                                                   | Coeff.                                 | CI         | p    | Coeff.                                       | CI         | p     | OR                   | CI        | p     |
| Age, gender, year                                                                                         | 0.12                                   | 0.02-0.23  | 0.02 | 0.03                                         | 0.01-0.06  | 0.004 | 1.47                 | 1.16-1.86 | 0.001 |
| + socioeconomic position                                                                                  | 0.07                                   | -0.03-0.18 | 0.17 | 0.02                                         | -0.00-0.04 | 0.12  | 1.33                 | 1.05-1.69 | 0.02  |
| + socioeconomic position and long-term illness                                                            | 0.06                                   | -0.04-0.17 | 0.25 | 0.02                                         | -0.01-0.04 | 0.15  | 1.31                 | 1.03-1.66 | 0.03  |
| + socioeconomic position, long-term illness and health behaviours                                         | 0.06                                   | -0.03-0.16 | 0.20 | 0.01                                         | -0.01-0.03 | 0.39  | 1.30                 | 1.01-1.67 | 0.04  |
| + socioeconomic position, long-term illness, health behaviours and GHQ-12                                 | 0.07                                   | -0.03-0.16 | 0.18 | 0.01                                         | -0.01-0.03 | 0.37  | 1.29                 | 1.00-1.66 | <0.05 |
