# Supplementary material for: Elevated inflammatory biomarkers during unemployment: modification by age and country in the UK
Source: HighWire-hosted journal article supplement (doi:10.1136/jech-2014-204404), 2015-02-19
Supplement: jech-2014-204404supp_appendixC.pdf [file jech-2014-204404supp_appendixC.pdf]

| <b>APPENDIX C: Elevations in inflammatory markers, unemployed vs. employed participants: SCOTLAND ONLY</b> |                                       |           |        |                                             |           |        |                 |           |        |
|------------------------------------------------------------------------------------------------------------|---------------------------------------|-----------|--------|---------------------------------------------|-----------|--------|-----------------|-----------|--------|
|                                                                                                            | CRP (mg/L, log-transformed)<br>N=4028 |           |        | Fibrinogen (g/L, log-transformed)<br>N=3522 |           |        | CRP>3mg/L<br>N= |           |        |
| <b>Adjustment level</b>                                                                                    | Coeff.                                | CI        | p      | Coeff.                                      | CI        | p      | OR              | CI        | p      |
| Age, gender, year                                                                                          | 0.58                                  | 0.40-0.76 | <0.001 | 0.12                                        | 0.08-0.16 | <0.001 | 2.49            | 1.65-3.75 | <0.001 |
| + socioeconomic position                                                                                   | 0.49                                  | 0.30-0.67 | <0.001 | 0.10                                        | 0.06-0.14 | <0.001 | 2.07            | 1.36-3.13 | 0.001  |
| + socioeconomic position and long-term illness                                                             | 0.48                                  | 0.30-0.67 | <0.001 | 0.10                                        | 0.06-0.14 | <0.001 | 2.06            | 1.35-3.14 | 0.001  |
| + socioeconomic position, long-term illness and health behaviours                                          | 0.43                                  | 0.25-0.62 | <0.001 | 0.08                                        | 0.03-0.12 | <0.001 | 2.01            | 1.26-3.21 | 0.003  |
| + socioeconomic position, long-term illness, health behaviours and GHQ-12                                  | 0.43                                  | 0.24-0.62 | <0.001 | 0.07                                        | 0.03-0.12 | <0.001 | 1.98            | 1.24-3.17 | 0.005  |
