# Supplementary material for: Elevated inflammatory biomarkers during unemployment: modification by age and country in the UK
Source: HighWire-hosted journal article supplement (doi:10.1136/jech-2014-204404), 2015-02-19
Supplement: jech-2014-204404supp_appendixD.pdf [file jech-2014-204404supp_appendixD.pdf]

| APPENDIX D: Age-adjusted associations of inflammatory markers with covariates. <sup>o</sup> p<0.05 *p<0.01 |                                   |                     |                   |                           |                   |                    |                          |
|------------------------------------------------------------------------------------------------------------|-----------------------------------|---------------------|-------------------|---------------------------|-------------------|--------------------|--------------------------|
|                                                                                                            |                                   | CRP (mg/L) N=23,025 |                   | Fibrinogen (g/L) N=20,724 |                   | CRP>3mg/L N=23,025 |                          |
|                                                                                                            |                                   | N                   | Mean              | N                         | Mean              | N                  | % CRP>3mg/L              |
| Age group                                                                                                  | 16-31 (Early career)              | 4621                | 1.69              | 4411                      | 2.54              | 4621               | 18.5                     |
|                                                                                                            | 32-47 (Mid-career)                | 9309                | 1.82*             | 8747                      | 2.71*             | 9309               | 19.1                     |
|                                                                                                            | 48-64 (Late career)               | 9095                | 2.30*             | 7566                      | 2.94*             | 9095               | 27.1                     |
| <i>Age-adjusted estimates for all other covariates: age centred at 41.2</i>                                |                                   | N                   | Age-adjusted mean | N                         | Age-adjusted mean | N                  | Age-adjusted Odds Ratios |
| Gender                                                                                                     | Men                               | 10900               | 1.79              | 9759                      | 2.65              | 10900              | 1                        |
|                                                                                                            | Women                             | 12125               | 2.08*             | 10965                     | 2.83*             | 12125              | 1.45*                    |
| Occupational social class (RGSC) from current or past employment                                           | i -professional                   | 1300                | 1.65              | 1198                      | 2.65              | 1300               | 1                        |
|                                                                                                            | ii-managerial-technical           | 7412                | 1.81*             | 6666                      | 2.71*             | 7412               | 1.28*                    |
|                                                                                                            | iii-nm - skilled non-manual       | 5309                | 2.02*             | 4818                      | 2.77*             | 5309               | 1.63*                    |
|                                                                                                            | iii-m - skilled manual            | 4100                | 1.99*             | 3664                      | 2.72*             | 4100               | 1.51*                    |
|                                                                                                            | iv - semi-skilled manual          | 3808                | 2.10*             | 3416                      | 2.80*             | 3808               | 1.75*                    |
|                                                                                                            | V – unskilled manual              | 1096                | 2.08*             | 962                       | 2.79*             | 1096               | 1.62*                    |
| Housing tenure                                                                                             | Owns outright                     | 5083                | 1.79              | 4331                      | 2.73              | 5083               | 1                        |
|                                                                                                            | Buying with a mortgage/loan       | 12959               | 1.87 <sup>o</sup> | 1,924                     | 2.71              | 12959              | 1.09                     |
|                                                                                                            | Renting/other                     | 4983                | 2.26*             | 4469                      | 2.84*             | 4983               | 1.64*                    |
| Cigarette smoking                                                                                          | Never smoker                      | 10365               | 1.79              | 9422                      | 2.69              | 10365              | 1                        |
|                                                                                                            | Ex-smoker                         | 6660                | 1.90*             | 5852                      | 2.68              | 6660               | 1.07                     |
|                                                                                                            | Current, <10/day                  | 1629                | 1.96*             | 1477                      | 2.79*             | 1629               | 1.22 <sup>o</sup>        |
|                                                                                                            | Current, 10-19/day                | 2436                | 2.23*             | 2207                      | 2.91*             | 2436               | 1.51*                    |
|                                                                                                            | Current, 20+/day                  | 1935                | 2.51*             | 1766                      | 2.97*             | 1935               | 1.91*                    |
| Drinking frequency in past 12 months                                                                       | Every couple months or less       | 2654                | 2.27              | 2331                      | 2.94              | 2654               | 1                        |
|                                                                                                            | Once or twice/month               | 2951                | 2.05*             | 2674                      | 2.89*             | 2951               | 0.83*                    |
|                                                                                                            | Once or twice/week                | 7474                | 1.96*             | 6828                      | 2.76*             | 7474               | 0.72*                    |
|                                                                                                            | 3 or 4 days/week                  | 4136                | 1.75*             | 3768                      | 2.65*             | 4136               | 0.59*                    |
|                                                                                                            | 5 days/week or more               | 4376                | 1.74*             | 3902                      | 2.56*             | 4376               | 0.59*                    |
|                                                                                                            | not in last 12 months/non-drinker | 1434                | 2.17              | 1221                      | 2.88*             | 1434               | 0.88                     |
| BMI categories                                                                                             | 18.5-24.99                        | 8778                | 1.40              | 8166                      | 2.62              | 8778               | 1                        |
|                                                                                                            | 25-29.99                          | 9174                | 1.90*             | 8276                      | 2.74*             | 9174               | 1.70*                    |
|                                                                                                            | 30+                               | 4829                | 3.12*             | 4060                      | 3.00*             | 4829               | 4.91*                    |
|                                                                                                            | <18.5                             | 244                 | 1.22              | 222                       | 2.57              | 244                | 0.87                     |

|                                                                                     |                                |       |       |       |                   |       |       |
|-------------------------------------------------------------------------------------|--------------------------------|-------|-------|-------|-------------------|-------|-------|
| Limiting long-term illness?                                                         | No long-term illness           | 14216 | 1.80  | 13321 | 2.72              | 14216 | 1     |
|                                                                                     | Limiting long-term illness     | 4502  | 2.33* | 3759  | 2.81*             | 4502  | 1.66* |
|                                                                                     | Non-limiting long-term illness | 4307  | 2.03* | 3644  | 2.76*             | 4307  | 1.27* |
| GHQ-12 score                                                                        | 0-3                            | 19876 | 1.90  | 17955 | 2.73              | 19876 | 1     |
|                                                                                     | 4+                             | 3149  | 2.17* | 2769  | 2.79*             | 3149  | 1.36* |
| Currently taking NSAIDs, statins, corticosteroids, beta-blockers or antidepressants | No                             | 20094 | 1.88  | 19256 | 2.74              | 20094 | 1     |
|                                                                                     | Yes                            | 2931  | 2.44* | 1468  | 2.78 <sup>o</sup> | 2931  | 1.64* |
